# Supplementary material for: Application of an in vitro-amplification assay as a novel pre-screening test for compounds inhibiting the aggregation of prion protein scrapie
Source: PubMed Central journal article supplement (PMC4935936; doi:10.1038/srep28711), 2016-07-07
Supplement: srep28711-s1.pdf [file srep28711-s1.pdf]

# Application of an *in vitro*-amplification assay as a novel pre-screening test for compounds inhibiting the aggregation of prion protein scrapie

Matthias Schmitz<sup>1#</sup>, Maria Cramm<sup>1#</sup>, Franc Llorens<sup>1</sup>, Niccolò Candelise<sup>1</sup>, Dominik Müller-Cramm<sup>1</sup>, Daniela Vargas<sup>1</sup>, Walter J. Schulz-Schaeffer<sup>2</sup>, Saima Zafar<sup>1</sup> and Inga Zerr<sup>1</sup>

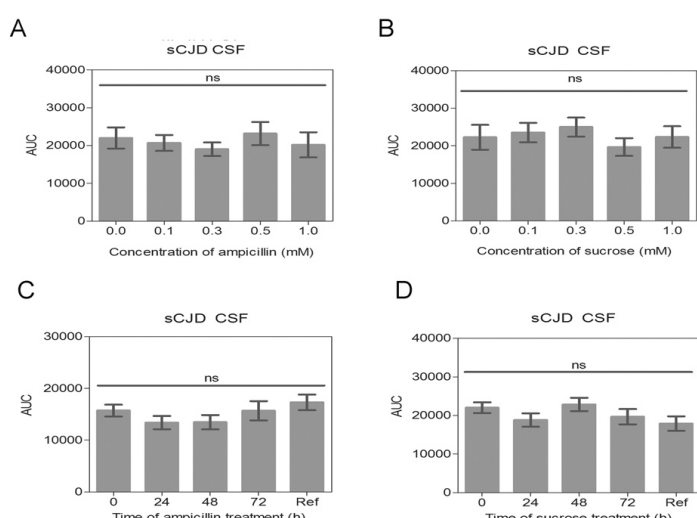

Supplement: 1

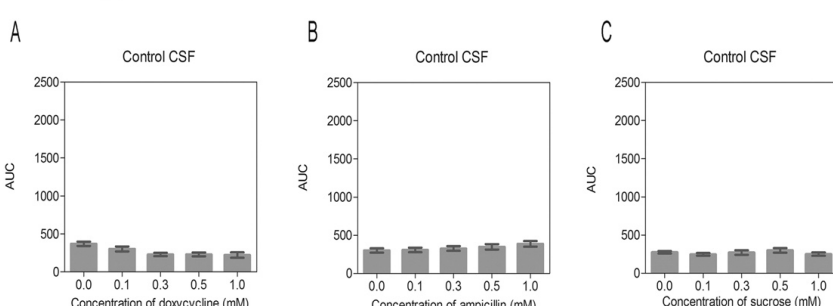

Supplement: 2

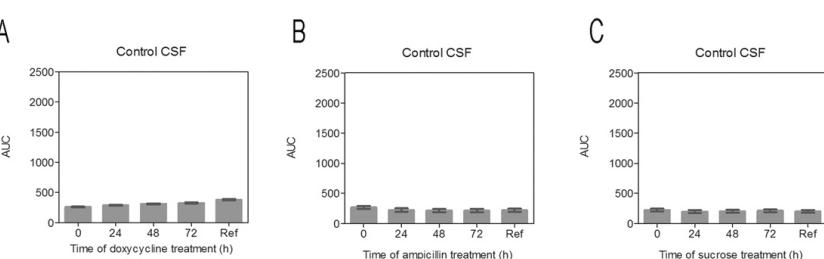

Supplement: 3

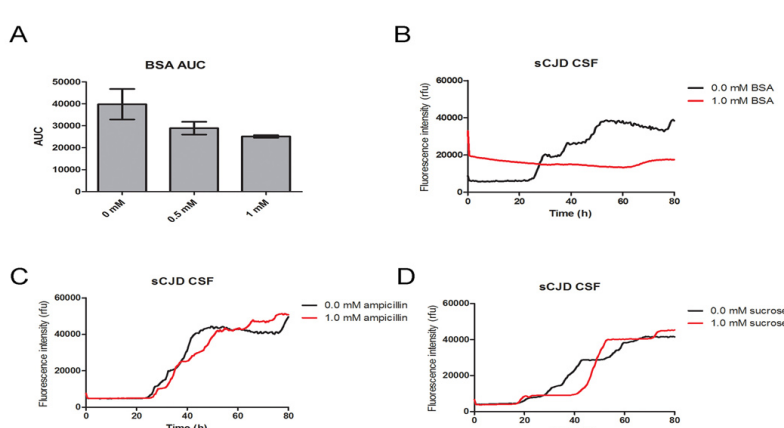

Supplement: 4

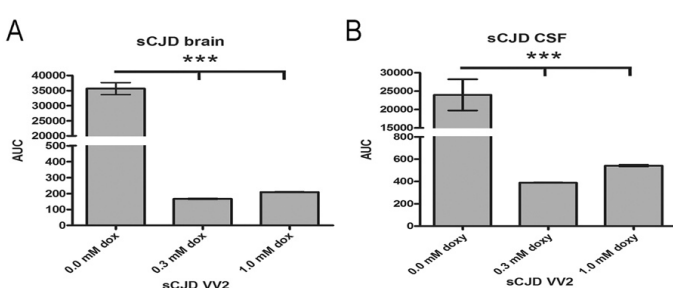

Supplement 5

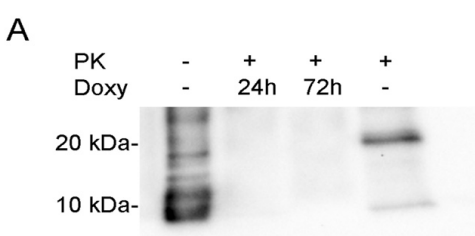

Supplement 6

**Supplement 1: Impact of the duration and the concentration of ampicillin and sucrose treatment on the RT-QuIC response of sCJD CSF samples.** (A) RT-QuIC reaction, seeded with CSF from sCJD (MM1) patients ( $n = 12$ ) were treated with different concentrations of ampicillin (A) and sucrose (B) (0.1, 0.3, 0.5 and 1.0 mM). Non-treated reactions were used as reference (0.0). Neither ampicillin nor sucrose affected PrP-seeding activity as defined by AUC. PrP-seeding activity was measured in sCJD (MM1) CSF samples ( $n = 12$ ) treated with ampicillin (C) and sucrose (D) at different times during the RT-QuIC analysis. 0.5 mM ampicillin and sucrose were added at the beginning of the run ( $t = 0$ ) and 24 ( $t = 24$ ), 48 ( $t = 48$ ) as well as 72 hours ( $t = 72$ ) after the run had been started showing no effect on the seeding of PrP. Non-treated reactions were used as reference (Ref). A p-value:  $< 0.001$  as extremely significant (\*\*\*),  $< 0.01$  as very significant (\*\*),  $< 0.05$  as significant (\*) and  $= 0.05$  as not significant (ns).

**Supplement 2: Impact of doxycycline-, ampicillin- and sucrose concentration on the RT-QuIC response of non-prion CSF samples.** RT-QuIC reactions seeded with the CSF of control samples ( $n = 12$ ) were treated with different concentrations of doxycycline (A), ampicillin (B) and sucrose (C) and analysed by RT-QuIC. Non-treated reactions were used as reference (0.0). All controls remained negative, regardless of the substance and its concentration.

**Supplement 3: Impact of the time point of doxycycline, ampicillin and sucrose treatment on the RT-QuIC response of non-prion CSF samples.** RT-QuIC reactions seeded with CSF of control samples ( $n = 12$ ) were treated at different times with 0.5 mM doxycycline (A), ampicillin (B) and sucrose (C) and analysed by RT-QuIC. Non-treated reactions were used as reference (Ref). All controls remained negative, regardless of the substance and the time of administration.

**Supplement 4: Impact of BSA treatment on the RT-QuIC signaling response of sCJD CSF samples.** RT-QuIC reactions seeded with CSF of sCJDMM1 patients ( $n = 5$ ) were treated with different concentrations of BSA. (A) Quantification of the RT-QuIC seeding response by calculating the area under the curve (AUC) values indicated no inhibitory effect of BSA (0.5 and 1 mM). (B-D) A comparison of the RT-QuIC signal kinetics of BSA, ampicillin and sucrose showed a spontaneous signal increase at time point zero in BSA (1 mM) treated reactions without a PrP seeding response.

**Supplement 5: Influence of doxycycline on other sCJD subtypes** (A, B) RT-QuIC reactions, seeded either with brain tissue (A) ( $n=5$ ) in a dilution of  $10^{-3}$  or with CSF from sCJD (VV2) patients ( $n = 5$ ) (B) were treated with different concentrations (0.0, 0.3 and 1.0 mM) of doxycycline. Calculation of the area under the curve (AUC) indicated a decrease of the RT-QuIC seeding after treatment with doxycycline.

**Supplement 6: PK resistance of RT-QuIC products after treatment with doxycycline** (A) Western blot detection of PK resistant PrP derived from RT-QuIC reactions treated with doxycycline. (B) RT-QuIC curves indicated the PrP seeding reaction after doxycycline treatment. The time point when samples were treated with PK and analysed by Western blot was marked by an asterisk (\*). The data indicated a correlation between the amount of PK resistant PrP and the Th-T signal in the RT-QuIC.
